# Supplementary figures and images for: The Impact of Different Winter Cover Crops on Weed Suppression and Corn Yield under Different Tillage Systems
Source: MDPI journal article supplement (doi:10.3390/agronomy12050999), 2022-04-21

# Supplementary materials

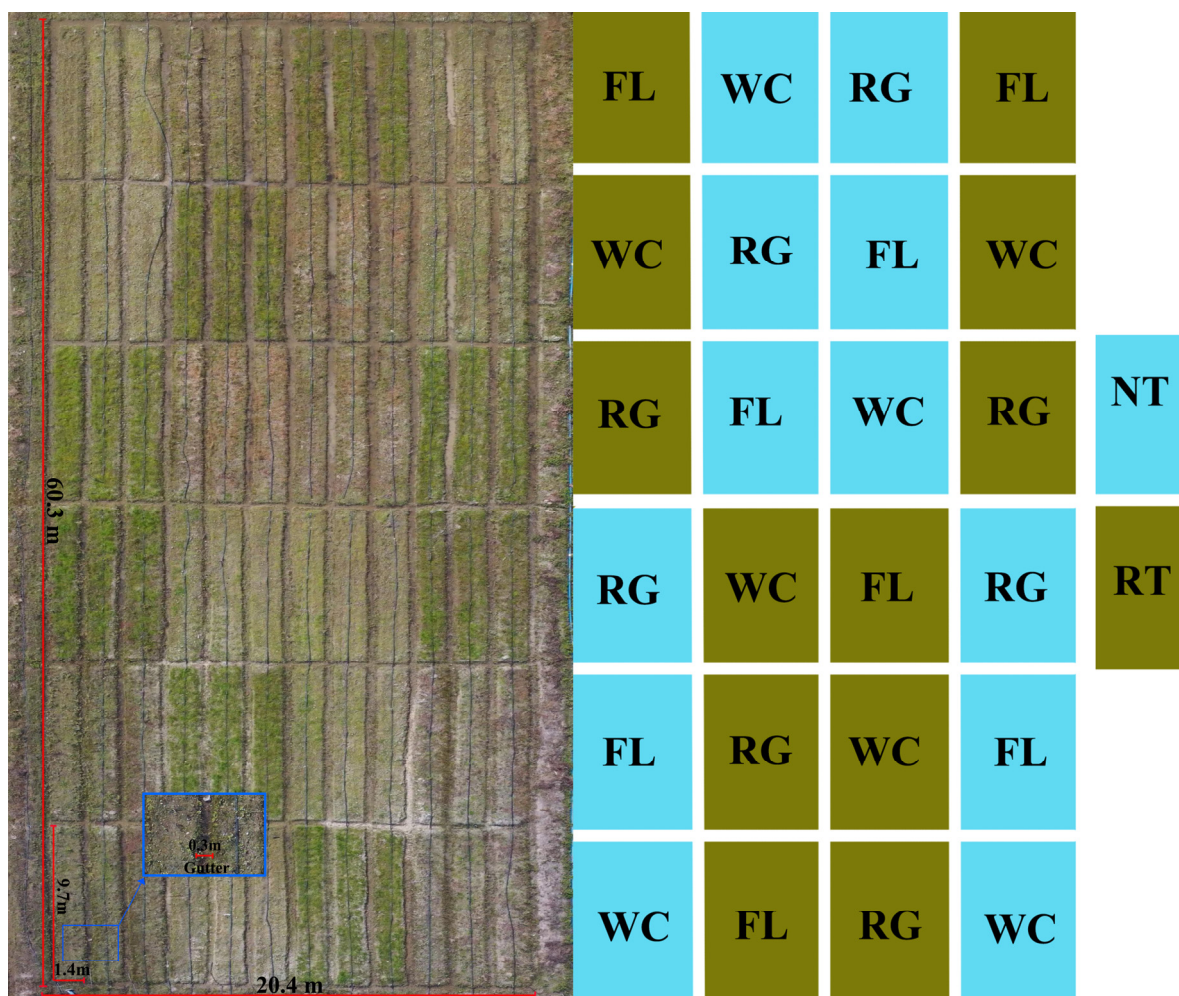

Figure S1. The plots distribution.

Supplement: s1 [file s1]
